# Supplementary material for: DUACS DT2021 reprocessed altimetry improves sea level retrieval in the coastal band of the European Seas
Source: Copernicus journal article supplement (doi:10.5194/egusphere-2023-63), 2023-01-18
Supplement: Supplementary file [file egusphere-2023-63-RC1-supplement.pdf]

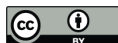

# DUACS DT2021 reprocessed altimetry improves sea level retrieval in the coastal band of the European Seas

Antonio Sánchez-Román<sup>1</sup>, M. Isabelle Pujol<sup>2</sup>, Yannice Faugère<sup>2</sup>, Ananda Pascual<sup>1</sup>

<sup>1</sup>Instituto Mediterráneo de Estudios Avanzados, C/Miquel Marqués, 21, 07190 Esporles, Spain

5 <sup>2</sup>Collecte Localisation Satellites, Parc Technologique du Canal, 8-10 rue Hermès, 31520 Ramonville-Saint-Agne, France

Correspondence to: Antonio Sánchez Román ([asanchez@imedea.uib-csic.es](mailto:asanchez@imedea.uib-csic.es))

**Abstract.** More than 29 years of altimeter data have been recently reprocessed by the multi satellite Data Unification and Altimeter Combination System (DUACS) and made available under the name of DT2021 processing through the Copernicus Marine Service (CMEMS) and the Copernicus Climate Change (C3S) Service. New standards have been applied and various geophysical correction parameters were updated compared to the previous release in order to improve the product quality. This paper describes the assessment of this new release through the comparison of both all satellites and two satellites products with external in situ tide gauge measurements in the coastal areas of the European Seas. The aim is to quantify the improvements on the previous DT2018 processing version on the retrieval of sea level in the coastal zone. The results confirmed that the new DT2021 processing version better solves the signal in the coastal band. Moreover, the all satellites dataset provided more accurate sea level measurements when comparing with tide gauges respect to the climatic two satellites dataset due to the better performance of the former for the assessment of higher than climatic frequency signals. On the opposite, we found the two satellite dataset the most suitable product for the assessment of long term sea level time series in the coastal zone due to its larger stability to the detriment of the all satellites dataset.

## 1 Introduction

20 On December 2021, more than 29 years of Level 3 (L3) and Level 4 (L4) altimetry products were reprocessed, released and made freely available for users as the “DT2021” version (Faugère et al., 2022) of the multi satellite Data Unification and Altimeter Combination System (DUACS) products by the European Copernicus Program (<http://marine.copernicus.eu/>) substituting the former “DT2018” product version (Taburet et al., 2019) which is no longer available in the Copernicus Catalogue. Currently, two types of altimetric L4 gridded products generated by the DUACS production system are available: 25 the so called all satellites global and regional (European Seas) gridded products disseminated via the Copernicus Marine Service (CMEMS) project (CMEMS-SL-QUID, 2022); and the two satellites global gridded products distributed via the Copernicus Climate Change Service (C3S) project (C3S-PUG, 2022). The all satellites products are dedicated to the retrieval of mesoscale signals on a global or regional scale whereas the two satellites ones are dedicated to monitoring the long term evolution of sea level, thus being suitable for using in climate applications (Taburet et al., 2019).



30 The Level 2 altimeter standards used to compute sea level anomaly (SLA) in the CMEMS and C3S products are identical  
(CMEMS-SL-QUID, 2022), but the reference used to compute SLAs differs: CMEMS products use a mean profile of sea  
surface heights along the theoretical track of the satellites with a repetitive orbit, whilst C3S products use a mean sea surface  
(MSS) for all missions. In the latest release, new **up to date** standards have been applied and various geophysical correction  
parameters have been updated compared to the previous DT2018 version. This provides both an improved accuracy of SLA  
35 and lower regional sea level biases. Namely, (i) a **new internal tide correction** that allows the prediction of the two main tidal  
constituents of both diurnal and semidiurnal tidal frequencies has been applied. This reduces the coherent signal characteristic  
of internal tide and provides a more precise reconstruction of mesoscale eddies. (ii) a **new MSS** for non-repetitive missions  
and recent missions consisting in a hybrid gridded MSS field made up of three different gridded MSS models is used. This  
hybrid solution contributes to reduce the SLA errors at short wavelengths. A **new mean profile** is used for historical repetitive  
40 missions (CMEMS products). This improves the SLA signal at long **wavelength**. (iii) a **new Mean Dynamic Topography** for  
the Global (Mulet et al., 2021); and the Mediterranean and Black Seas **are** applied (Jousset et al., 2020,2022). (iv) an **improved  
Long Wavelength Error (LWE) correction** has been computed to remove local SLA residual biases between neighbouring  
altimeter tracks. (v) and finally, the DT2021 products version includes an **upgraded mapping parameterisation** that  
contributes to improve the mesoscale signal visible on L4 products. A complete description of the different evolutions  
45 implemented in the DUACS DT2021 products version can be found in CMEMS-SL-QUID (2022).

The validation (quality check) of altimetry products is a key step in the data processing pipe to assess and characterise the  
errors associated with the altimetry measurements. This issue is crucial in the coastal zone, where traditional altimetry have  
been often unable to produce meaningful signals of sea level change due to the typically shallower water, bathymetric  
gradients, and shoreline shapes, among others (Vignudelli et al., 2019; Sánchez-Román et al., 2020). Different metrics are  
50 used to assess the quality of altimetry data. They mainly consist in the analysis of the SLA field at different **step** of the  
processing; check consistency of the SLA along the tracks of different altimeters and between gridded and along track products;  
and comparisons with external in situ measurements (CMEMS-SL-QUID, 2022). In situ and altimetric observations are  
complementary and are often assumed to observe the same signals (Wöppelmann and Marcos, 2016). In coastal areas, tide  
gauge measurements are commonly used. In Taburet et al. (2019), DUACS DT2018 L4 global gridded products were assessed  
55 in the coastal areas through a comparison with monthly tide gauge measurements from the Permanent Service for Mean Sea  
Level (PSMSL) Network (PSMSL, 2016). These authors reported a global reduction of 0.6% in variance with respect to the  
previous processing (DUACS DT2014 dataset). Pascual et al. (2006, 2009) investigated the consistency between previous  
versions of the altimeter L4 gridded products and tide gauge data from the PSMSL repository in the coastal zone reporting  
mean square differences between the two datasets ranging between 30% and 90% in the European coasts. More recently,  
60 Sánchez-Román et al. (2020) assessed the quality of DUACS L3 products in the coastal band of the European Seas through  
comparison with independent tide gauge measurements. These authors reported a mean root mean square (rms) difference  
between both datasets lower than 7 cm for the whole region, with mean values ranging around less than 4 cm in the



Mediterranean basin and around 10 cm for the North West European Shelf (NWS) area (see Fig. 2 in Sánchez-Román et al., 2020 for the location of this region). The quality of the DUACS DT2021 product version has been also assessed through the  
65 comparison with monthly tide gauge measurements from the Global Sea Level Observing System (GLOSS)/Climate Variability and Predictability (CLIVAR) network. CMEMS-SL-QUID (2022) reports improved results when using the latest reprocessing with a reduction in variance of the differences between altimetry and tide gauges ranging between 0.2% and more than 5% of the tide gauge signal in the European coasts; with respect to the previous product version.

This paper focuses on improvements of the latest reprocessing of DUACS Delayed Time (DT) reanalysis (referred hereinafter as DT2021) in the retrieval of sea level in the coastal band of the European Seas with respect to the previously available  
70 reprocessed products (referred hereafter as DT2018). To do that, we conduct an intercomparison of L4 global altimetry gridded products and in situ tide gauges located along the European coasts from the Copernicus Catalogue. The performance of the DT2021 processing *all satellites* and *two satellites* versions on the sea level retrieval is also assessed. The paper is organized as follows: the SLA data used, the tide gauge dataset, and the method for comparing altimeter and in situ measurements are  
75 detailed in section 2. Section 3 describes the performance of the DT2021 processing product version in the retrieval of sea level in the coastal band. Also, the improvements over the previous DT2018 processing product version is assessed. Finally, the discussion and main conclusions are included in section 4.

## 2 Materials and methods

### 2.1 Sea level anomaly data

80 The DUACS reprocessed L4 global satellite SLA maps used in this study correspond to both the DT2021 (Faugère et al., 2022) and DT2018 product (Taburet et al., 2019) versions. SLA gridded products cover the global ocean with a spatial and temporal resolution of respectively  $\frac{1}{4}$  of a degree and 1 day. We used two different SLA datasets for each one of the DUACS product versions: the *all satellites* L4 global gridded product disseminated via the CMEMS and the *two satellites* L4 global gridded product distributed via the C3S. The first one is computed with a satellite constellation including all the available altimeters at  
85 a given time (ranging from 2 to 7 over the period considered in this study). As a consequence, the errors are not constant in time since they depend on the number of satellites used. This product focuses on the mesoscale mapping capacity of the altimeter data together with the stability of the overall dataset. The *two satellites* SLA dataset is obtained by merging a steady number of altimeters (two) in the satellite constellation. Two satellites is the minimum requirement to retrieve mesoscale signals in delayed time conditions (Pascual et al., 2006; Dibarboure et al., 2011). This fact also promotes nearly consistent  
90 errors during the whole time period (some variation of the error can occur related to changes of the *two satellites* constellation). This product focuses on the stability of the global mean sea level (MSL), even if this implies potential reduction of the spatial sampling of the ocean. The reader is referred to Fig. 1 in Sánchez-Román et al. (2020) for more information about the DUACS procedure flowchart applied to the altimetry data; and also to the processing of the tide gauge data used to compare with



altimetry (next section). The time period investigated spans from 1 January 1993 to 31 May 2020 due to the presently  
95 availability of DUACS DT2018 products. A complete description of the SLA datasets can be found in CMEMS-SL-QUID  
(2022).

## 2.2 Tide gauge observations

The sea level records used to compare with satellite altimetry were extracted from the Copernicus Catalogue  
([www.marineinsitu.eu](http://www.marineinsitu.eu)). The tide gauge stations located in the European Seas' domain were initially considered for this study.  
100 Following the methodology described in Sánchez-Román et al. (2020), the quality flags of the tide gauge records were checked  
in order to remove observations with no quality check; potentially and bad data; and changes in the vertical reference of the  
tide gauge. Also, observations with values larger than three times the standard deviation of the time series were rejected. The  
final dataset consists of 213 tide gauge stations (Fig. 1) with time series exhibiting between 90% and 100% of valid data. The  
stations and their information are listed in Table A1 in the Appendix A.

105 Before they can be compared with altimeter data, tide gauge measurements have to be processed (Valladeau et al., 2012;  
Cipollini et al., 2017; Sánchez-Román et al., 2020) to remove oceanographic signals whose temporal periods are not resolved  
by altimetry, thus avoiding important aliasing errors (Vignudelli et al., 2019). We applied the methodology described in  
Sánchez-Román et al. (2020). In the following we summarise the corrections applied to the tide gauge records:

- 110 • **correction of oceanic tidal effects** by filtering tidal components. We used the u-tide software (Codiga, 2011). The  
annual and semiannual frequencies are kept in the tidal residuals since they are included in the altimetry data.
- **Removal of the atmospherically induced sea level** caused by the action of atmospheric pressure and wind (Dorandeu  
and Le Traon, 1999; Carrère and Lyard, 2003). The same Dynamic Atmospheric Correction (DAC) as for altimetry  
115 is applied for the sake of consistency. We used the 6 hourly fields of this correction, available at the Archiving,  
Validation and Interpretation of Satellite Oceanographic Data (AVISO) website. For each tide gauge site, the nearest  
grid point was selected and used to remove the atmospherically induced sea level from observations, previously  
converted into 6 hourly records (Marcos et al., 2015).
- **Correction of vertical movements** associated with glacial isostatic adjustment (GIA). We considered GIA as the  
only source of vertical land motions. We removed its effects from the SSH records, previously averaged into daily  
data, by using the Peltier mantle viscosity model (VM2) (Peltier, 1998, 2004).

## 120 2.3 Method for comparing altimeter and in situ tide gauge records

The comparison method of altimetry with tide gauges consisted of collocating both datasets in time and space. As a first step,  
a 15 day low pass Loess filter was applied to altimetry and tide gauge time series to remove the high frequencies that cannot



be resolved by the altimetric data (Pascual et al., 2009; Ballarotta et al., 2019; Sánchez-Román et al., 2020). Then, we computed the correlations between each tide gauge record and SLA time series corresponding to grid points within a radius of 1 degree around the tide gauge site and **choose** the most correlated altimetry point. We used only **long term** monitoring stations with a lifetime of more than three years in order to allow statistical significance. Statistical analyses were performed using all available data pairs (altimetry-tide gauge). The collocated altimeter and tide gauge measurements were analysed in terms of the rms difference and variance of the time series. In addition, the robustness of the results was investigated according to Sánchez-Román et al. (2017, 2020) using a bootstrap method (Efron and Tibshirani, 1986), which allows us to estimate quantities related to a dataset by averaging estimates from multiple data samples. To do that, the dataset is iteratively resampled with replacement. A total of 1.000 iterations were used to ensure that meaningful statistics such as standard deviation could be calculated on the sample of estimated values, thus allowing us to assign measures of accuracy to sample estimates (Sánchez-Román et al., 2020).

### 3 Results

#### 135 3.1 Performance of DUACS DT2021 products in the retrieval of sea level in the coastal band

This section presents the statistics of the comparisons performed between the DUACS DT2021 *all satellites* and *two satellites* datasets; and the tide gauge observations from the Copernicus catalogue in the coastal region of the European Seas in terms of errors (rms differences) and variance of the differences between the datasets. **According to Sánchez-Román et al. (2020), the bootstrapping technique was applied to gain an estimation of the standard errors of the differences between the datasets.**

140 The mean value of the rms difference between the *all satellites* dataset and tide gauges is 4.11 cm; the variance of the differences (altimetry–tide gauge) is 17 cm<sup>2</sup>; and the mean distance between the location of the tide gauge and the corresponding altimeter data with the highest correlation is 82 km (Table 1). These values raise to 4.35 cm, 19 cm<sup>2</sup>, and 87 km, respectively, when using the *two satellites* dataset. The tide gauge stations (213 stations) common to both datasets were used. Thus, the *all satellites* dataset reduces the rms differences with tide gauges in the European coasts by 5%; the variance differences between the datasets by 10%. **The** mean distance between the most correlated altimetry point and tide gauges **is reduced** by 6%. Also, the number of valid data pairs used to conduct the intercomparison enhanced by 0.2% when using the *all satellites* dataset. This is due to the larger number of satellite missions used to generate this dataset, that provides lower errors in the optimal interpolation procedure compared to the *two satellites* dataset.

150 **Table 1. Intercomparison of DUACS DT2021 satellite altimetry (ALT) and tide gauge (TG) data from the European coasts in terms of the rms differences (cm) and variance (cm<sup>2</sup>) of the differences between the datasets. The number of tide gauge stations used in the comparison, the mean distance between tide gauges and the most correlated gridded altimetry points, and the number of total data pairs (altimetry-tide gauge) used in the computation are displayed. The common tide gauge stations for the *all satellites* and *two satellites* datasets were used. Values in parenthesis show the uncertainties (error bars) computed for the rms differences and variance**

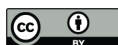

155 from the bootstrap method using 1.000 iterations. Finally, the improvement (%) of the *all satellites* dataset in comparison with tide gauges in terms of lower rms differences, lower variance of the differences (altimetry-tide gauge), and lower mean distance between the most correlated altimetry point and tide gauges with respect to the *two satellites* dataset is also displayed.

| DUACS DT2021                  | <i>all satellites</i> dataset | <i>two satellites</i> dataset | <i>all satellites</i> improvement |
|-------------------------------|-------------------------------|-------------------------------|-----------------------------------|
| rms diff. (cm)                | 4.11 (0.01)                   | 4.35 (0.01)                   | 5 %                               |
| var TG (cm <sup>2</sup> )     | 89 (1)                        |                               |                                   |
| var ALT (cm <sup>2</sup> )    | 81 (1)                        | 79 (1)                        |                                   |
| var TG-ALT (cm <sup>2</sup> ) | 17 (1)                        | 19 (1)                        | 10 %                              |
| data pairs                    | 1.163.588                     | 1.161.315                     | 0.2 %                             |
| stations                      | 213                           |                               |                                   |
| Distance TG (km)              | 82                            | 87                            | 6 %                               |

Fig. 1 shows the consistency between the DUACS DT2021 *all satellites* dataset and the tide gauge data computed from Eq. (1) in Sánchez-Román et al. (2020). Consistency is expressed as the mean square differences between both datasets, computed as the variance of the differences (altimetry–tide gauge), in terms of percentage of the tide gauge variance.

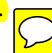

160 Overall, mean square differences lower than 5 % are observed in the central and eastern parts of the Baltic Sea, this emphasising the precision of the corrections applied to the altimeter data in the basin; whereas they reach values between 20% and 30% for stations located in the connection region with the North Atlantic Ocean. The mean square differences are between 20% and 50% for most of the stations located along the Atlantic shore; this including the Strait of Gibraltar area. Such large error could be related to imprecisions of the correction applied (i.e. ocean tide) to the altimeter data (Sánchez-Román et al., 2020); and also to both the larger spatiotemporal variability observed in this region (figure not shown); and a larger non tidal variance with respect to that found in the Baltic Sea (Von Schuckmann et al., 2018). Finally, the Mediterranean and Norwegian Seas show mean square differences ranging between 15% and 30%, except for the Balearic Islands (western Mediterranean) and the southwestern part of Norway where values between 5% and 15% are obtained. The consistency between the DUACS DT2021 *two satellites* dataset and tide gauges (figure not shown) presents a quite similar spatial pattern and results. These outcomes improve the ones reported in Sánchez-Román et al. (2020) from the intercomparison conducted between Sentinel-3A L3 along track DUACS DT2018 dataset and tide gauge measurements in the region computed over a period of two and half years.



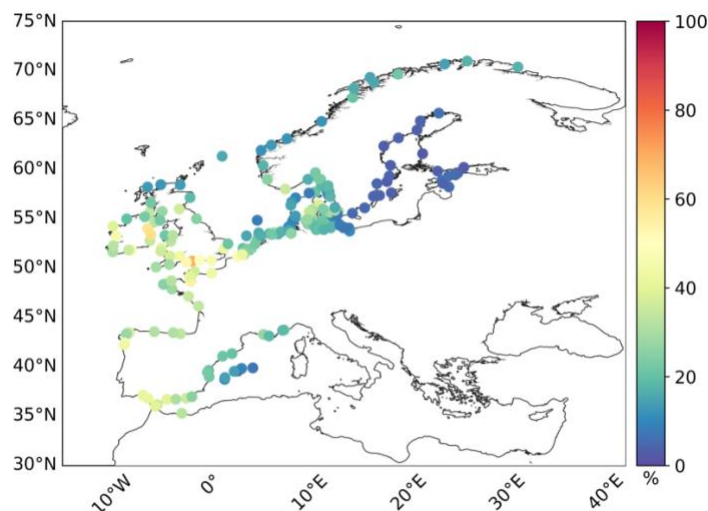

175 **Figure 1.** Location of the 213 tide gauges of the global product in the Copernicus catalogue along the European coasts and the western Mediterranean Sea used to compare with altimetry data after applying the selection criteria described in the text. Colours indicate the mean square differences between the tide gauge and altimetry sea level (DT2021 *all satellites* series). Units are the percentage of the tide gauge variance.

### 3.2 Improvement of DT2021 over DT2018 reprocessing

180 **3.2.1 all satellites SLA dataset**

This section focuses on the statistics of the comparisons performed between the DUACS DT2021 and DT2018 reprocessing *all satellites* datasets, and the tide gauge observations. The mean value of the rms difference between the DT2018 processing dataset and tide gauges is 4.22 cm; the variance of the differences (altimetry–tide gauge) is 18 cm<sup>2</sup>; and the mean distance between the location of the tide gauge and the corresponding altimeter data with the highest correlation is 88 km (Table 2).

185 **Table 2.** The same as Table 1 but for the intercomparison using the DUACS DT2018 reprocessing. The improvements (%) of the DUACS DT2021 reprocessing *all satellites* and *two satellites* SLA datasets with respect to the previous DT2018 reprocessing are also shown.

| DUACS DT2018                  | <i>all satellites</i> dataset | <i>two satellites</i> dataset | <i>all satellites</i> DT2021 improvement | <i>two satellites</i> DT2021 improvement |
|-------------------------------|-------------------------------|-------------------------------|------------------------------------------|------------------------------------------|
| rms diff. (cm)                | 4,22 (0,01)                   | 4,41 (0,01)                   | 3 %                                      | 1 %                                      |
| var TG (cm <sup>2</sup> )     | 89 (1)                        |                               |                                          |                                          |
| var ALT (cm <sup>2</sup> )    | 80 (1)                        | 78 (1)                        |                                          |                                          |
| var TG-ALT (cm <sup>2</sup> ) | 18 (1)                        | 19 (1)                        | 5 %                                      | no improvement                           |
| data pairs                    | 1.162.231                     | 1.161.349                     | 0,1 %                                    | no improvement                           |
| stations                      | 213                           |                               |                                          |                                          |
| Distance TG (km)              | 88                            | 90                            | 7 %                                      | 3 %                                      |



Overall, these values are larger than those reported in the previous section for the comparison using the DT2021 processing dataset (see Table 1). As a consequence, the DT2021 *all satellites* dataset reduces (i) the errors with tide gauges in the European  
190 coasts by 3%, (ii) the variance of the differences between the datasets by 5%, and (iii) the mean distance between the most correlated altimetry point and tide gauges by 7%. Also, the number of valid data pairs used to conduct the intercomparison **enhances** by 0.1% when using the DT2021 processing *all satellites* dataset. This highlights the impact of the new DUACS DT2021 reprocessing on the coastal areas, that provides more valid measurements, located closer to the tide gauge sites, compared to DT2018 reprocessing.

195 The new standards and updated geophysical corrections applied to the DUACS DT2021 reprocessing compared to the previous DT2018 version have a direct impact on the observation of coastal ocean sea level in the gridded products. To characterise this impact, the difference between DT2021 and DT2018 consistency is shown in Fig. 2. The spatial distribution of the differences in consistency shows an overall better performance of the DT2021 reprocessing (blue colours) at the connection region between the Baltic Sea and the eastern North Atlantic Ocean; and in most of the Atlantic shore, where an improvement larger than 15%  
200 is found for some tide gauge sites. We observe a degradation of the DT2021 reprocessing in most of the stations located in the western Mediterranean Sea and the southern coasts of Spain, **this** including the Strait of Gibraltar area; and also in some stations located in the coasts of France, England and Ireland. On the other hand, we hardly observe discrepancies between the two **reprocessing** in the Baltic and Norwegian Seas.

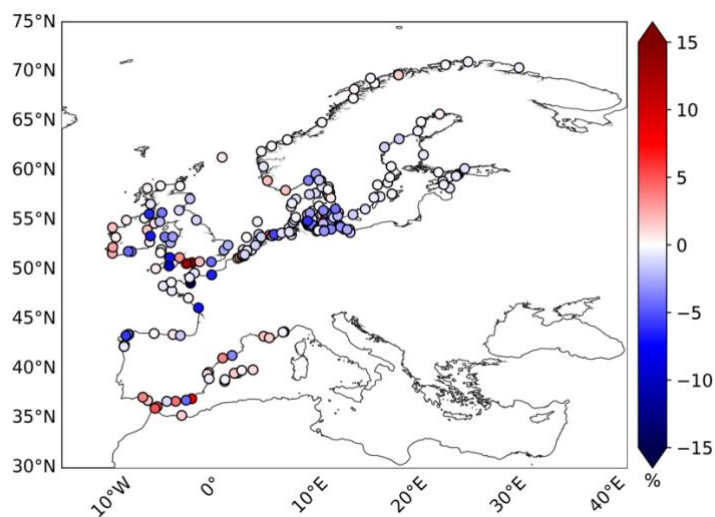

205 **Figure 2. Spatial distribution of the differences (DT2021 minus DT2018) for the mean square differences between the tide gauge and altimetry sea level. Units are the percentage of the tidal variance. The SLA *all satellites* dataset has been used. Blue colours denote an improvement of the DUACS DT2021 reprocessing whilst red colours indicate its degradation with respect to the DT2018 reprocessing.**





### 210 3.2.2 **two satellites SLA dataset**

We present here the statistics of the intercomparison between the climatic (two satellites) DT2021 and DT2018 processing; and tide gauges. The mean value (Table 2) of the rms difference between the DT2018 processing dataset and tide gauges is 4.41 cm; the variance of the differences (altimetry–tide gauge) is 19 cm<sup>2</sup>; and the mean distance between the location of the tide gauge and the corresponding altimeter data with the highest correlation is 90 km. If we compare these results with those reported above for the comparison using the DT2021 processing dataset (Table 1), we observe that the latter only improves the previous DT2018 reprocessing in terms of the errors with tide gauges, that are reduced by 3%, and the mean distance between the most correlated altimetry point and tide gauges, reduced by 7%; whereas the variance of the differences between the datasets and the number of valid data pairs used to conduct the intercomparison are quite similar. Such improvements are around 60% lower than those reported for the *all satellites* datasets. This fact is reflected in the spatial distribution of the differences between DT2021 and DT2018 consistency with tide gauges (figure not shown). We obtain a better performance of the DT2021 reprocessing at the connection region between the Baltic Sea and the eastern North Atlantic Ocean; and in part of the Atlantic shore (coasts of United Kingdom and France). There is a degradation of the DT2021 reprocessing in most of the stations located in the western Mediterranean Sea and the southern coasts of Spain; and in some stations located in the coasts of France, England and Ireland. Also, we found negligible discrepancies between the two reprocessing in the Baltic Sea. This spatial pattern is quite similar to that obtained for the *all satellites* dataset described above. However, a degradation of the DT2021 reprocessing is observed in most of the stations located in both the NWS region (southern coasts of the North Sea) and the Norwegian Sea. This is a novelty with respect to the previous computation emphasising the overall poorer improvements of the DUACS DT2021 *two satellites* dataset over the previous reprocessing.

### 3.2 Performance of DT2021 reprocessing in monitoring the long term evolution of sea level

230 The computation described above has been conducted by using all available information from the tide gauge dataset, thus including time series of different length spanning from few years to less than three decades (Table A1 of Appendix A). To assess the performance of DUACS DT2021 processing version in monitoring the **long term** evolution of sea level in the coastal zone of the European Seas we repeated the analyses described above for a specific time period spanning 20 years: from 1 January 2000 to 31 December 2019. This time period has been chosen because of the largest number of available altimeter missions used to generate the *all satellites* SLA maps. Tide gauge time series with valid data within such time interval were considered; this allowing the intercomparison altimetry–tide gauges for long term time series with the same length. Moreover, only tide gauge time series with at least 99% of valid data were used in order to allow the analysis of linear trends. This reduced the original tide gauge dataset to a subset of 27 stations (Tables A1, A2 of Appendix A) mainly located in the northern half of the Baltic Sea (70% of stations) with sparse stations distributed along the coasts of France and Spain (Fig. 3). This analysis  
240 **has been also** conducted for the DUACS DT2018 reprocessing for comparison purposes.

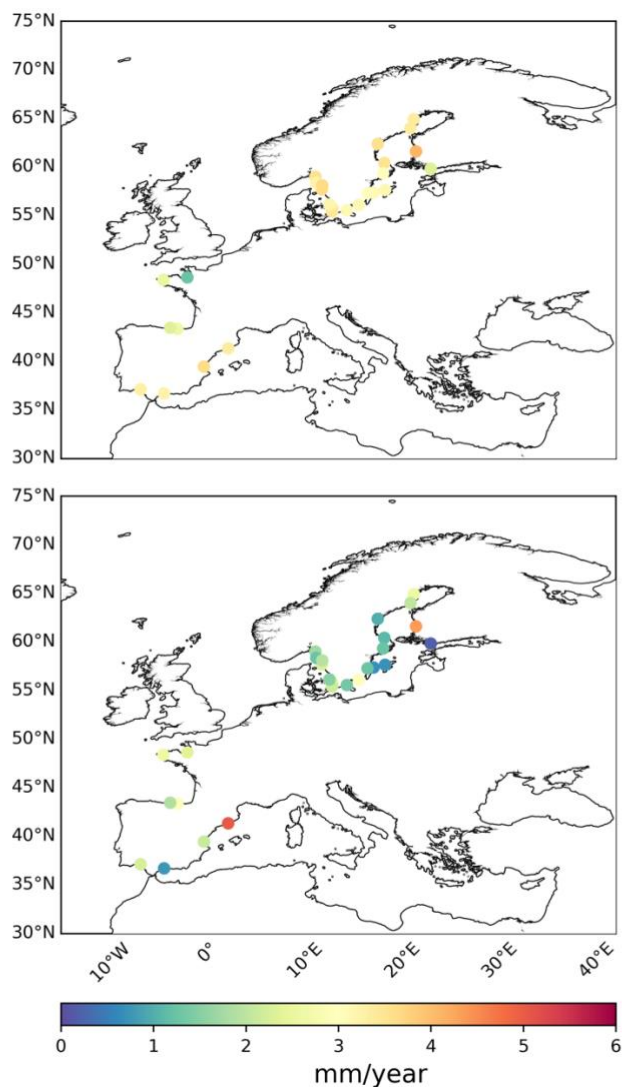

245 **Figure 3. Spatial distribution of linear trends (mm year<sup>-1</sup>) for altimetry (upper panel) and tide gauges (lower panel) computed from monthly averaged data for the 20 year time period spanning from 1 January 2000 to 31 December 2019. The *all satellites* dataset from the DUACS DT2021 reprocessing has been used.**

Linear trends based on monthly observations at each tide gauge site (Fig. 3 and Table A2 of Appendix A) computed from DUACS DT2021 *all satellites* dataset (upper panel) show a homogeneous spatial pattern with overall values varying from 2.30 to 4.10 mm year<sup>-1</sup> in the Baltic and Mediterranean Seas, and between 2.30 and 3.30 mm year<sup>-1</sup> in the sparse stations located along the North Atlantic European shore, except for the station of SaintMalo that presents a linear trend of 1.26 mm year<sup>-1</sup>.  
250 Linear trends computed from tide gauges (lower panel) exhibit a more heterogeneous spatial pattern with values ranging between less than 1 mm year<sup>-1</sup> for some stations located in the Baltic Sea, and 5.06 mm year<sup>-1</sup> for the station of Barcelona



(western Mediterranean Sea). However, most of the tide gauge stations present trend values ranging from 1.30 to 3 mm year<sup>-1</sup>. These results provide further evidence, if needed, **the rise in the coastal sea level of the European Seas, this** including the westernmost part of the Mediterranean Sea. The differences in trends between the two datasets vary, in absolute values, between near 0 mm year<sup>-1</sup> (Brest station, Atlantic French coast) to close to 2.60 mm year<sup>-1</sup> found in the station of Spikarna (Baltic Sea).

Linear trends computed from DUACS DT2021 *two satellites* dataset (figure not shown) exhibit a quite similar spatial pattern with values ranging from 2.60 to 3.80 mm year<sup>-1</sup> in the Baltic and Mediterranean Seas; and between 2.40 and 3.40 mm year<sup>-1</sup> along the North Atlantic European coasts. However, some discrepancies between the two datasets are observed. These differences, computed as *all satellites* minus *two satellites* datasets, are displayed in Fig. 4. We obtain overall larger linear trends (up to 1 mm year<sup>-1</sup>) for the *all satellites* dataset in the northernmost and central Baltic Sea as well as in the stations located in the Mediterranean Sea whilst lower values of the same magnitude are mainly observed at the entrance of the Baltic Sea and in most of the stations located along the North Atlantic European shore.

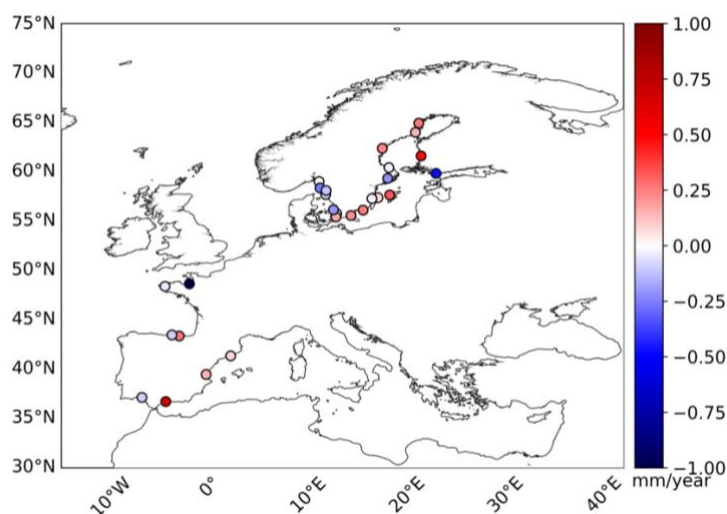

**Figure 4. Spatial distribution of the differences (*all satellites* minus *two satellites* datasets) for the linear trends (mm year<sup>-1</sup>) for altimetry computed from monthly averaged data for the 20 year time period spanning from 1 January 2000 to 31 December 2019. The DUACS DT2021 processing version has been used. Blue (red) colours denote lower (larger) trends for the *all satellites* dataset.**

On the other hand, linear trends computed from the DT2018 reprocessing (figures not shown) exhibit a quite similar spatial pattern than that reported for the DT2021 processing version with overall values ranging from 2.20 (2.40) to 4.35 (3.60) mm year<sup>-1</sup> in the Baltic and Mediterranean Seas; and between 2.40 (2.10) and 3.05 (2.85) mm year<sup>-1</sup> along the North Atlantic European coasts for the *all satellites* (*two satellites*) dataset. Thus, **hardly differences** in range are observed between the *all satellites* dataset from the two reprocessing whereas these differences increase for the *two satellites* dataset with a lower

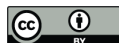

variability observed for the DT2018 reprocessing. This fact has an impact on the spatial distribution of the differences between the two processing versions (Fig. 5).

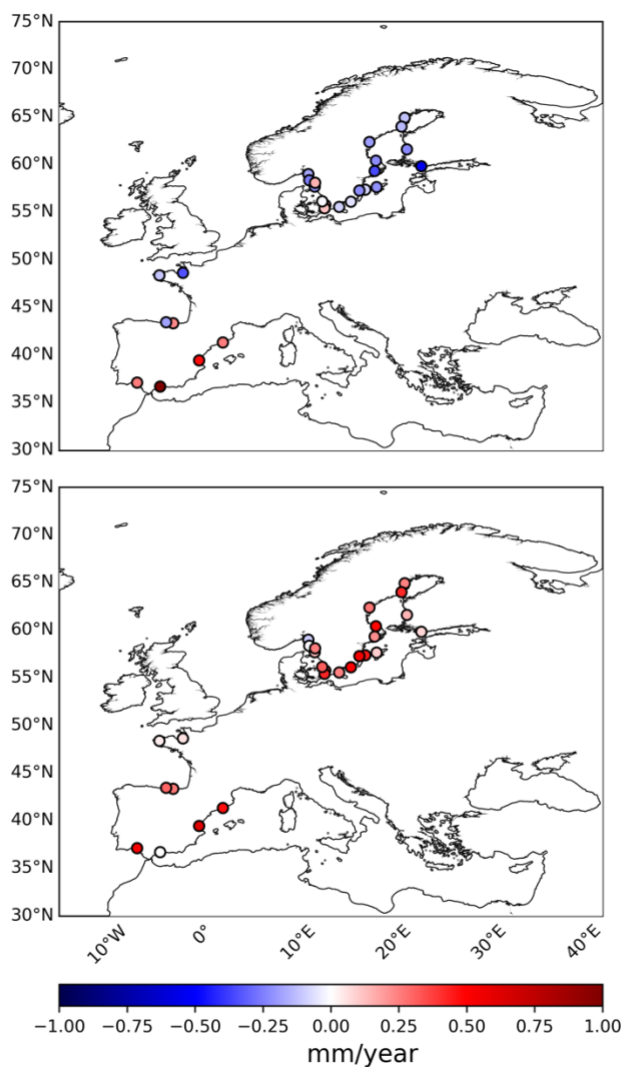

275

**Figure 5.** Spatial distribution of the differences (DT2021 minus DT2018 reprocessing) for linear trends ( $\text{mm year}^{-1}$ ) for altimetry computed from the *all satellites* dataset (upper panel) and the *two satellites* dataset (lower panel). Monthly averaged data for the **20 year** time period spanning from 1 January 2000 to 31 December 2019 has been used. Blue (red) colours denote lower (larger) trends for the DT2021 reprocessing.

280 For the *all satellites* dataset (upper panel in Fig. 5), we observe two **difference** spatial patterns with lower trends for the DT2021 reprocessing in the Baltic Sea basin and most of the stations located along the North Atlantic European coasts; whereas larger



values are obtained for the tide gauge stations located in the western Mediterranean Sea and some sparse stations at the entrance of the Baltic Sea. On the contrary, the spatial distribution of the differences between the two reprocessing for the *two satellites* dataset (lower panel in Fig. 5) depicts **an homogeneous** spatial pattern with overall larger trends for the DT2021 reprocessing  
285 except for the tide gauge station of Barseback located in the connection region between the Baltic Sea and the eastern North Atlantic Ocean (Table A2 in the Appendix A). Fig. 5 also reveals the differences between the two reprocessing, and for the two datasets, when comparing with linear trends from tide gauges: the *two satellites* dataset from the DT2021 processing version presents larger differences with tide gauges with respect to the DT2018 reprocessing in the whole domain; whilst this is only observed for sparse stations along the North Atlantic shore and the stations located in the Mediterranean Sea for the *all*  
290 *satellites* dataset. **Thus, we obtain closer results between DT2021 reprocessing and tide gauges with respect to the former DT2018 processing version in most of the Baltic Sea region and the stations located along the North Atlantic European coast.**

#### 4 Discussion and conclusions

More than 29 years of DUACS Level 3 and Level 4 altimeter data have been recently reprocessed and delivered under the name of DT2021 processing version through the Copernicus Marine Service (*all satellites* dataset) and the Copernicus Climate  
295 Change Service (*two satellites* dataset). The *all satellites* SLA products include all the available altimeter missions (ranging from 2 to 7 over the period considered in this study), **this making** the errors not constant in time since they depend on the number of satellites used. **Thus,** maps from the *all satellites* products provide the most accurate sea level estimation with the best spatial and temporal sampling of the ocean at all times. The *two satellites* SLA dataset is obtained by merging a steady number of altimeters (two) in the satellite constellation. This promotes consistent errors during the whole time period. Maps  
300 that include only two satellites are used to compute the most homogeneous and stable sea level record over time and space. Thus, *two satellites* products are dedicated to monitoring long term sea level evolution for climate applications and analysing ocean–climate indicators such as global and regional MSL evolution (Taburet et al., 2019).

The new standards applied to the DT2021 version; and the update of various geophysical correction parameters compared to the previous release **improved the product quality** having a direct impact on the observation of coastal ocean sea level in the  
305 gridded products. To achieve independent comparisons, SLA from altimetry in the coastal zone of the European Seas were examined through comparison with in situ tide gauge measurements. Compared to the previous DT2018 version, we obtained **improvements (reduction) of all satellites dataset of 3% in errors with tide gauges; and 5% in the variance of the differences between the datasets.** The mean distance between the most correlated altimetry point and tide gauges reduced by 7%. Also, the number of valid data pairs used to conduct the intercomparison enhanced by 0.1% when using the DT2021 processing.  
310 This highlights the impact of the new DUACS DT2021 version on the coastal areas, that provides more valid measurements, located closer to the tide gauge sites, compared to DT2018 reprocessing. On the other hand, **we found an overall poorer improvement of the DT2021 two satellites dataset over the previous reprocessing: errors with tide gauges were reduced by**



1%, and the mean distance between the most correlated altimetry point and tide gauges was reduced by 3%. The variance of the differences between the datasets and **the number of valid data pairs used to conduct the intercomparison were quite similar.**

315 These improvements **are** around 60% lower than those reported for the *all satellites* datasets. This fact could be explained by differences in the mapping parameters used for the two products: DT2021 mapping parameters (**i.e.** spatial and temporal correlation scales; a priori errors on the measurements) are evolved in CMEMS products (CMEMS QUID, 2022) with the objective to better retrieve mesoscale signals; whilst no evolution of the mapping **parameter** was implemented in C3S DT2021 product (C3S PUG, 2022).

320 The quality assessment of DUACS DT2021 reprocessing revealed a better performance of the *all satellites* products in the retrieval of SSH in the coastal zone with respect to the *two satellites* products for the time period investigated (27 years). Namely, we obtained a reduction of 5% in errors with tide gauges and 10% in variance difference between altimetry and tide gauges when using the *all satellites* dataset with respect to the *two satellites* product. This is because despite the larger stability of the *two satellites* dataset, this product is optimised for climatic signal. Thus, it is less performant for higher frequency

325 signals. In this context (analysis of high frequency signals), the results reported here show that the *all satellites* dataset should be considered for the analysis of long time series of SSH in the coastal zone of the European Seas. This can be clearly seen in Fig. 6 showing the differences (computed as *all satellites* minus *two satellites* datasets) for consistency between altimetry and tide gauges.

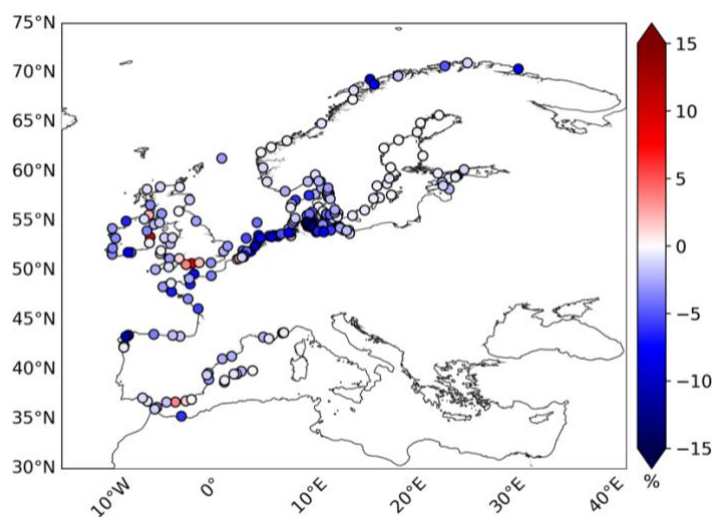

330 **Figure 6. Spatial distribution of the differences (*all satellites* minus *two satellites* datasets) for the mean square differences between the tide gauge and altimetry sea level. Units are the percentage of the tidal variance. The DUACS DT2021 processing version has been used. Blue (red) colours denote an improvement (degradation) of the *all satellites* dataset.**





We observe an overall better performance (blue colours) of the *all satellites* product in the whole domain except in the Baltic Sea and the westernmost part of the Norwegian Sea, where similar results are obtained. The improvement is larger in most of the Atlantic shore; namely at the connection region between the Baltic Sea and the eastern North Atlantic Ocean, the NWS region and the northern Norwegian Sea with a reduction in the variance difference between the two datasets larger than 15%. The Mediterranean Sea and the Strait of Gibraltar area show closer values between the two products with an improvement lower than 5%. There are also sparse stations showing a degradation of the *all satellites* product located in the coasts of United Kingdom and Spain. These outcomes could be explained by the better sampling of high frequency signal in the coastal zone in *all satellites* dataset due to the large number of altimeters available to generate the SLA maps compared to the *two satellites* maps. Improved mapping parameters for mesoscale (and thus high frequency) processes could also contribute.

Linear trends based on monthly observations at each tide gauge site were computed to assess whether the DUACS DT2021 release can be representative of the local sea level along the European coasts and western Mediterranean Sea. To do that, we computed sea level linear trends for the period 2000-2019 from both the *all satellites* and *two satellites* datasets. We repeated the analysis for the DT2018 reprocessing to have a term of comparison. We obtained a homogeneous spatial pattern with overall values ranging from 2.30 (2.40) to 4.10 (3.80) mm year<sup>-1</sup> for the *all satellites* (*two satellites*) dataset from the DT2021 reprocessing. This promotes a mean trend for the whole domain of 3.14 (3.13) mm year<sup>-1</sup>. These trends slightly differ from those computed from the tide gauge subset covering the 20 year time period showing values ranging between less than 1 to 5.06 mm year<sup>-1</sup>; the mean trend for the whole domain is 1.96 mm/year. On the other hand, when using the former DUACS DT2018 processing version we obtained slightly larger discrepancies with tide gauges for the *all satellites* dataset, with a mean trend of 3.18 mm year<sup>-1</sup>; whilst the *two satellites* product showed closer values to tide gauges with a mean linear trend of 2.85 mm year<sup>-1</sup>.

Overall, we obtained linear trend differences (altimetry – tide gauge) for the DT2021 reprocessing varying, in absolute value, from 0.16 to 2.57 mm year<sup>-1</sup>, in an average of 1.43 mm year<sup>-1</sup> for the *all satellites* dataset; and from 0.03 to 2.65 mm year<sup>-1</sup>, in an average of 1.40 mm year<sup>-1</sup> for the *two satellites* dataset. These low discrepancies corroborate the agreement and complementarity of the two techniques to measure sea level variability in the coastal zone and emphasise a better performance of the C3S DT2021 dataset in the estimation of sea level linear trends in the coastal zone. This was also corroborated by the computation conducted for the DT2018 reprocessing: we obtained lower differences between tide gauge and altimetry trends computed from the *two satellites* dataset. Fig. 7 displays the spatial distribution of the differences in trend computed as altimetry minus tide gauges for the *two satellites* dataset from the DT2021 reprocessing. We obtained an overall overestimation of trends from altimetry in the whole domain. On the contrary, we found three tide gauge sites: Bilbao in the Atlantic Spanish coast; Pori at the eastern side of the Baltic Sea; and Barcelona in the western Mediterranean Sea (Table A2 in Appendix A) showing a long term sea level linear trend 0.58, 0.70 and 1.81 mm year<sup>-1</sup> larger, respectively, than that found for the closest altimetry point with the largest correlation. The differences in trend could be attributed to the altimetry measurements being



not accurate enough in the coastal zone. In any case, the linear trends for the tide gauge of **Barcelona** described above are of the same order of magnitude than those reported by Taibi and Haddad (2019) computed for the time period spanning from 1993 to 2015 (linear trend of  $2.74 \text{ mm year}^{-1}$  for altimetry;  $6.73 \text{ mm year}^{-1}$  for the tide gauge; trend difference of  $3.99 \text{ mm year}^{-1}$ ), thus supporting the results obtained here.

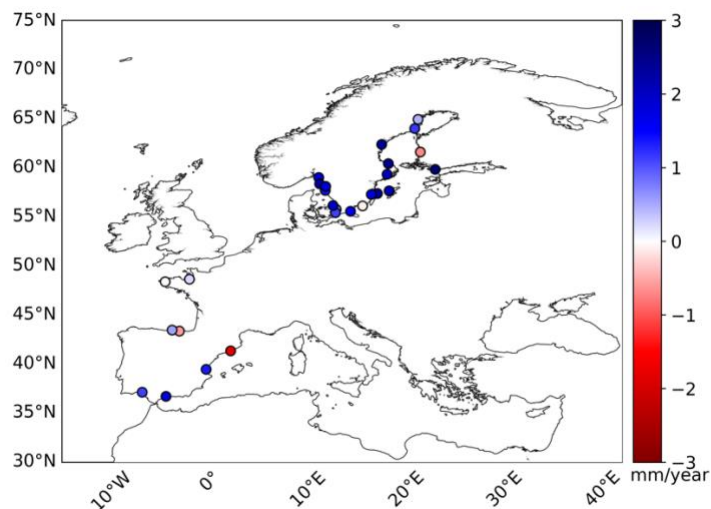

370

**Figure 7. Spatial distribution of the differences in linear trends ( $\text{mm year}^{-1}$ ) between the altimetry and tide gauge sea level computed for the 20 year time period spanning from 1 January 2000 to 31 December 2019. The *two satellites* dataset from the DUACS DT2021 reprocessing has been used. Blue (red) colours denote a larger (lower) altimetry linear trend.**

The intercomparison conducted here between L4 gridded products from the new DUACS DT2021 release and the DT2018 version previously available; and tide gauges have demonstrated the better performance of the new DT2021 version in the retrieval of sea level in the coastal zone of the European Seas. Furthermore, the *all satellites* dataset provided more accurate sea level measurements when comparing with tide gauges respect to the climatic *two satellites* dataset due to the better performance of the former for the assessment of higher than climatic frequency signals. On the opposite, when analysing linear trends from **20 year** long time series we found the *two satellite* dataset the most suitable product for the assessment of **long**  
380 **term** sea level time series in the coastal zone due to its larger stability to the detriment of the CMEMS *all satellites* dataset.

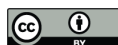

## Appendix A

**Table A1. List of the 213 tide gauge records with their location and time period analysed. Bold stations indicate the tide gauge sites from the subset covering the 20-year period spanning from January 2000 to December 2019 listed in Table A2.**

|    | Station name              | Lon (°E)     | Lat (°N)     | Period analysed          |     | Station name       | Lon (°E)     | Lat (°N)     | Period analysed          |
|----|---------------------------|--------------|--------------|--------------------------|-----|--------------------|--------------|--------------|--------------------------|
| 1  | Bagenkop                  | 10.68        | 54.75        | 11/2006 - 05/2020        | 52  | <b>Ratan</b>       | <b>20.90</b> | <b>63.99</b> | <b>01/1993 - 05/2020</b> |
| 2  | Bandholm                  | 11.48        | 54.83        | 01/2014 - 05/2020        | 53  | Ringhals           | 12.11        | 57.25        | 01/1993 - 05/2020        |
| 3  | Barhoeft                  | 13.03        | 54.44        | 01/2011 - 05/2020        | 54  | Rodby              | 11.35        | 54.65        | 01/2005 - 05/2020        |
| 4  | <b>Barseback</b>          | <b>12.9</b>  | <b>55.76</b> | <b>01/1993 - 05/2020</b> | 55  | Rodvig             | 12.37        | 55.25        | 01/1993 - 05/2020        |
| 5  | Bogense                   | 10.08        | 55.57        | 01/2014 - 05/2020        | 56  | Rohukula           | 23.42        | 58.90        | 12/2009 - 12/2019        |
| 6  | Dragor                    | 12.68        | 55.60        | 07/2011 - 05/2020        | 57  | Roskilde           | 12.08        | 55.65        | 12/2011 - 05/2020        |
| 7  | Drogden                   | 12.71        | 55.54        | 01/1993 - 05/2020        | 58  | Rostock            | 12.15        | 54.08        | 01/2011 - 05/2020        |
| 8  | Eckernfoerde              | 9.84         | 54.47        | 01/2011 - 05/2020        | 59  | <b>Simrishamn</b>  | <b>14.36</b> | <b>55.56</b> | <b>01/1993 - 05/2020</b> |
| 9  | Faaborg                   | 10.25        | 55.10        | 01/2014 - 05/2020        | 60  | SjallandsOdde      | 11.37        | 55.97        | 01/1993 - 05/2020        |
| 10 | <b>Forsmark</b>           | <b>18.21</b> | <b>60.41</b> | <b>01/1993 - 05/2020</b> | 61  | Skagen             | 10.59        | 57.72        | 04/1993 - 09/2018        |
| 11 | Fredericia                | 9.75         | 55.57        | 01/2005 - 05/2020        | 62  | Skagsudde          | 19.01        | 63.19        | 10/1993 - 05/2020        |
| 12 | <b>Furuogrund</b>         | <b>21.23</b> | <b>64.92</b> | <b>01/1993 - 05/2020</b> | 63  | <b>Skanor</b>      | <b>12.83</b> | <b>55.42</b> | <b>01/1993 - 07/2018</b> |
| 13 | Gedser                    | 11.93        | 54.57        | 03/1993 - 05/2020        | 64  | <b>Smogen</b>      | <b>11.22</b> | <b>58.35</b> | <b>01/1993 - 05/2020</b> |
| 14 | GoteborgAgnesberg         | 12.01        | 57.79        | 01/2013 - 05/2020        | 65  | Sonderborg         | 9.78         | 54.92        | 01/2014 - 05/2020        |
| 15 | GoteborgEriksberg         | 11.91        | 57.70        | 01/2013 - 05/2020        | 66  | <b>Spikarna</b>    | <b>17.53</b> | <b>62.36</b> | <b>01/1993 - 05/2020</b> |
| 16 | GoteborgLarjeholm         | 12.01        | 57.77        | 01/2013 - 05/2020        | 67  | <b>Stenungsund</b> | <b>11.83</b> | <b>58.09</b> | <b>01/1993 - 05/2020</b> |
| 17 | GoteborgTingstadstunneln  | 11.99        | 57.72        | 01/2013 - 05/2020        | 68  | <b>Stockholm</b>   | <b>18.08</b> | <b>59.32</b> | <b>01/1993 - 05/2020</b> |
| 18 | <b>GoteborgTorshamnen</b> | <b>11.79</b> | <b>57.68</b> | <b>01/1993 - 05/2020</b> | 69  | Stralsund          | 13.10        | 54.32        | 01/2011 - 05/2020        |
| 19 | Greifswald                | 13.45        | 54.09        | 01/2011 - 05/2020        | 70  | Tallinn            | 24.76        | 59.44        | 11/2005 - 05/2020        |
| 20 | Grena                     | 10.93        | 56.41        | 01/1993 - 05/2020        | 71  | TimmendorfPoel     | 11.38        | 53.99        | 01/2011 - 05/2020        |
| 21 | <b>Hanko</b>              | <b>22.98</b> | <b>59.82</b> | <b>01/1993 - 05/2020</b> | 72  | Travemuende        | 10.87        | 53.96        | 01/2005 - 05/2020        |
| 22 | Heiligenhafen             | 11.01        | 54.37        | 01/2011 - 05/2020        | 73  | Uddevala           | 11.89        | 58.35        | 12/2010 - 05/2020        |
| 23 | Holbaek                   | 11.72        | 55.72        | 12/2011 - 05/2020        | 74  | Ueckermuende       | 14.07        | 53.75        | 01/2011 - 05/2020        |
| 24 | Hov                       | 10.27        | 55.92        | 12/2011 - 05/2020        | 75  | Vedbaek            | 12.57        | 55.85        | 12/2011 - 05/2020        |
| 25 | Juelsminde                | 10.02        | 55.72        | 12/1996 - 05/2020        | 76  | <b>Viken</b>       | <b>12.58</b> | <b>56.14</b> | <b>01/1993 - 05/2020</b> |
| 26 | Kalix                     | 23.10        | 65.70        | 01/1993 - 05/2020        | 77  | Virtsu             | 23.51        | 58.58        | 12/2009 - 05/2020        |
| 27 | Kalkgrund                 | 9.89         | 54.82        | 01/2011 - 05/2020        | 78  | <b>Visby</b>       | <b>18.28</b> | <b>57.64</b> | <b>01/1993 - 05/2020</b> |
| 28 | Kalvehave                 | 12.17        | 55.00        | 01/2014 - 05/2020        | 79  | Wismar             | 11.46        | 53.90        | 01/2011 - 05/2020        |
| 29 | Kappeln                   | 9.94         | 54.66        | 01/2011 - 05/2020        | 80  | Wolgast            | 13.77        | 54.04        | 01/2011 - 05/2020        |
| 30 | Karrebaeksminde           | 11.65        | 55.18        | 01/2014 - 05/2020        | 81  | <b>BrestTG</b>     | <b>-4.50</b> | <b>48.38</b> | <b>01/1993 - 05/2020</b> |
| 31 | Kelnase                   | 25.01        | 59.64        | 02/2017 - 05/2020        | 82  | CherbourgTG        | -1.64        | 49.65        | 01/1993 - 05/2020        |
| 32 | KielHoltenuau             | 10.16        | 54.37        | 01/2005 - 05/2020        | 83  | ConcarneauTG       | -3.91        | 47.87        | 06/1999 - 05/2020        |
| 33 | KielLTG                   | 10.27        | 54.50        | 01/2011 - 05/2020        | 84  | LaRochelleTG       | -1.23        | 46.15        | 10/1995 - 05/2020        |
| 34 | Koege                     | 12.20        | 55.45        | 01/2012 - 05/2020        | 85  | LeConquetTG        | -4.78        | 48.36        | 01/1993 - 05/2020        |
| 35 | Koserow                   | 14.00        | 54.06        | 11/2005 - 11/2019        | 86  | LeHavreTG          | 0.11         | 49.48        | 01/1993 - 05/2020        |
| 36 | Kristineberg1             | 11.45        | 58.25        | 04/2012 - 05/2020        | 87  | MarseilleTG        | 5.35         | 43.28        | 10/1998 - 05/2020        |
| 37 | <b>Kungsholmsfort</b>     | <b>15.59</b> | <b>56.11</b> | <b>01/1993 - 05/2020</b> | 88  | MonacoTG           | 7.42         | 43.73        | 04/1999 - 05/2020        |
| 38 | <b>Kungsvik</b>           | <b>11.13</b> | <b>59.00</b> | <b>01/1993 - 05/2020</b> | 89  | NiceTG             | 7.29         | 43.70        | 03/1998 - 05/2020        |
| 39 | LandsortNorra             | 17.86        | 58.77        | 10/2004 - 05/2020        | 90  | RoscoffTG          | -3.97        | 48.72        | 01/1993 - 05/2020        |
| 40 | Langballigau              | 9.65         | 54.82        | 01/2011 - 05/2020        | 91  | SaintGildasTG      | -2.25        | 47.14        | 02/1993 - 06/2017        |
| 41 | Leppneeme                 | 24.87        | 59.55        | 02/2017 - 05/2020        | 92  | <b>SaintMaloTG</b> | <b>-2.03</b> | <b>48.64</b> | <b>08/1993 - 04/2020</b> |
| 42 | Luebeck                   | 10.70        | 53.89        | 01/2011 - 05/2020        | 93  | ToulonTG           | 5.91         | 43.12        | 01/1993 - 05/2020        |
| 43 | Marviken                  | 16.84        | 58.55        | 01/1993 - 09/2019        | 94  | Aberdeen           | -2.08        | 57.15        | 01/1993 - 05/2020        |
| 44 | Munalaiu                  | 24.12        | 58.23        | 02/2016 - 05/2020        | 95  | AlcudiaTG          | 3.14         | 39.83        | 09/2009 - 05/2020        |
| 45 | Neustadt                  | 10.81        | 54.10        | 01/2011 - 05/2020        | 96  | AlgecirasTG        | -5.40        | 36.18        | 07/2009 - 05/2020        |
| 46 | <b>OlandsNorraUdde</b>    | <b>17.10</b> | <b>57.37</b> | <b>01/1993 - 05/2020</b> | 97  | AlmeriaTG          | -2.48        | 36.83        | 01/2006 - 05/2020        |
| 47 | Onsala                    | 11.92        | 57.39        | 06/2015 - 05/2020        | 98  | Aranmore           | -8.50        | 54.99        | 05/2008 - 05/2020        |
| 48 | <b>Oskarshamn</b>         | <b>16.48</b> | <b>57.28</b> | <b>01/1993 - 05/2020</b> | 99  | ArklowHarbur       | -6.15        | 52.79        | 08/2003 - 05/2020        |
| 49 | Paldiski                  | 24.08        | 59.33        | 10/2006 - 05/2020        | 100 | Ballycotton        | -8.00        | 51.83        | 10/2010 - 05/2020        |
| 50 | <b>Pori</b>               | <b>21.46</b> | <b>61.59</b> | <b>01/1993 - 05/2020</b> | 101 | Ballyglass         | -9.89        | 54.25        | 05/2008 - 04/2020        |
| 51 | Porvoo                    | 25.63        | 60.21        | 08/2014 - 05/2020        | 102 | Bangor             | -5.67        | 54.67        | 11/1994 - 05/2020        |

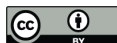

| Station name | Lon (°E)           | Lat (°N)     | Period analysed | Station name             | Lon (°E) | Lat (°N)              | Period analysed |       |                   |
|--------------|--------------------|--------------|-----------------|--------------------------|----------|-----------------------|-----------------|-------|-------------------|
| 103          | <b>BarcelonaTG</b> | <b>2.16</b>  | <b>41.34</b>    | <b>01/1993 - 05/2020</b> | 162      | AlteWeserTG           | 8.13            | 53.86 | 01/2014 - 05/2020 |
| 104          | Barmouth           | -4.03        | 52.72           | 01/1993 - 05/2020        | 163      | AndenesTG             | 16.13           | 69.33 | 01/2014 - 05/2020 |
| 105          | <b>BilbaoTG</b>    | <b>-3.05</b> | <b>43.36</b>    | <b>01/1993 - 05/2020</b> | 164      | AWGTG                 | 5.94            | 53.49 | 06/2015 - 05/2020 |
| 106          | BonanzaTG          | -6.34        | 36.80           | 01/1993 - 05/2020        | 165      | BergenTG              | 5.32            | 60.40 | 01/2007 - 05/2020 |
| 107          | Bournemouth        | -1.87        | 50.71           | 06/1996 - 05/2020        | 166      | BodoeTG               | 14.39           | 67.29 | 01/2007 - 05/2020 |
| 108          | CarbonerasTG       | -1.90        | 36.97           | 07/2013 - 05/2020        | 167      | BorkumTG              | 6.75            | 53.56 | 01/2014 - 05/2020 |
| 109          | Castletownbere     | -9.90        | 51.65           | 12/2006 - 05/2020        | 168      | Brouwershavensegat8TG | 3.62            | 51.77 | 08/2014 - 12/2019 |
| 110          | CorunaTG           | -8.39        | 43.36           | 01/1993 - 05/2020        | 169      | CadzandTG             | 3.38            | 51.38 | 08/2014 - 12/2019 |
| 111          | Dundalk            | -6.39        | 54.01           | 04/2008 - 01/2013        | 170      | DenHelderTG           | 4.75            | 52.97 | 01/2014 - 12/2019 |
| 112          | Felixstowe         | 1.35         | 51.97           | 01/1993 - 01/2011        | 171      | EemshavenTG           | 6.84            | 53.46 | 08/2014 - 05/2020 |
| 113          | Fenit              | -9.86        | 52.27           | 01/2007 - 05/2020        | 172      | EuroplatformTG        | 3.28            | 52.00 | 01/2014 - 12/2019 |
| 114          | Ferrol2TG          | -8.25        | 43.48           | 01/2007 - 05/2020        | 173      | F3platformTG          | 4.72            | 54.85 | 08/2014 - 12/2019 |
| 115          | FerrolTG           | -8.33        | 43.46           | 01/2007 - 05/2020        | 174      | HammerfestTG          | 23.68           | 70.66 | 01/2014 - 05/2020 |
| 116          | Fishguard          | -4.98        | 52.02           | 01/1993 - 05/2020        | 175      | HanstholmTG           | 8.60            | 57.12 | 01/2015 - 05/2020 |
| 117          | FormenteraTG       | 1.42         | 38.73           | 09/2009 - 05/2020        | 176      | HarstadTG             | 16.55           | 68.80 | 01/2014 - 05/2020 |
| 118          | GandiaTG           | -0.15        | 38.99           | 07/2007 - 05/2020        | 177      | HavnebyTG             | 8.57            | 55.09 | 01/2015 - 05/2020 |
| 119          | GijonTG            | -5.70        | 43.56           | 07/1995 - 05/2020        | 178      | HelgeroaTG            | 9.86            | 59.00 | 01/2007 - 05/2020 |
| 120          | Hinkley            | -3.13        | 51.22           | 01/1993 - 05/2020        | 179      | HelgolandTG           | 7.89            | 54.18 | 01/2014 - 05/2020 |
| 121          | Holyhead           | -4.62        | 53.32           | 02/2005 - 05/2020        | 180      | HirtshalsTG           | 9.97            | 57.60 | 01/2015 - 05/2020 |
| 122          | Howth              | -6.07        | 53.39           | 10/2006 - 11/2019        | 181      | HoekVanHollandTG      | 4.12            | 51.98 | 01/2014 - 12/2019 |
| 123          | <b>HuelvaTG</b>    | <b>-6.83</b> | <b>37.13</b>    | <b>09/1996 - 05/2020</b> | 182      | HoernumTG             | 8.30            | 54.76 | 01/2014 - 05/2020 |
| 124          | IbizaTG            | 1.45         | 38.91           | 01/2003 - 05/2020        | 183      | HonningsvaagTG        | 25.97           | 70.98 | 01/2007 - 05/2020 |
| 125          | Ilfracombe         | -4.12        | 51.22           | 01/1993 - 05/2020        | 184      | HuibergatTG           | 6.40            | 53.57 | 06/2014 - 12/2019 |
| 126          | Kinlochbervie      | -5.05        | 58.46           | 01/1993 - 05/2020        | 185      | IJmondstroompaalTG    | 4.52            | 52.46 | 08/2014 - 05/2020 |
| 127          | LangosteiraTG      | -8.53        | 43.35           | 01/2014 - 05/2020        | 186      | K141TG                | 3.63            | 53.27 | 06/2015 - 05/2020 |
| 128          | Leith              | -3.18        | 55.99           | 01/1993 - 05/2020        | 187      | KabelvaagTG           | 14.48           | 68.21 | 01/2007 - 05/2020 |
| 129          | Llandudno          | -3.82        | 53.31           | 05/2014 - 05/2020        | 188      | KristiansundTG        | 7.73            | 63.11 | 01/2007 - 05/2020 |
| 130          | Lowestoft          | 1.75         | 52.47           | 01/1993 - 05/2020        | 189      | L91TG                 | 4.87            | 53.57 | 06/2015 - 05/2020 |
| 131          | MahonTG            | 4.27         | 39.89           | 10/2009 - 05/2020        | 190      | LauwersoogTG          | 6.20            | 53.41 | 06/2015 - 12/2019 |
| 132          | <b>MalagaTG</b>    | <b>-4.42</b> | <b>36.71</b>    | <b>01/1993 - 05/2020</b> | 191      | LichteilandGoeree1TG  | 3.67            | 51.93 | 01/2015 - 05/2020 |
| 133          | MarinTG            | -8.69        | 42.41           | 01/2010 - 05/2020        | 192      | ListTG                | 8.44            | 55.02 | 01/2014 - 09/2018 |
| 134          | MelillaTG          | -2.92        | 35.29           | 10/2007 - 05/2020        | 193      | MaloyTG               | 5.11            | 61.93 | 01/2007 - 05/2020 |
| 135          | Millford           | -5.05        | 51.72           | 01/1993 - 05/2020        | 194      | MandoTG               | 8.58            | 55.28 | 01/2015 - 05/2020 |
| 136          | Millport           | -4.90        | 55.75           | 01/1993 - 05/2020        | 195      | NieuwpoortTG          | 2.73            | 51.15 | 08/2014 - 05/2020 |
| 137          | MotrilTG           | -3.52        | 36.72           | 01/2005 - 05/2020        | 196      | NorderneyTG           | 7.16            | 53.70 | 01/2014 - 05/2020 |
| 138          | Newhaven           | 0.07         | 50.78           | 01/1993 - 05/2020        | 197      | NorthCormorantTG      | 1.16            | 61.34 | 08/2014 - 05/2020 |
| 139          | Newlyn             | -5.53        | 50.10           | 01/1993 - 09/2018        | 198      | OostendeTG            | 2.93            | 51.23 | 08/2014 - 05/2020 |
| 140          | NorthShields       | -1.43        | 55.00           | 01/1993 - 05/2020        | 199      | OscarsborgTG          | 10.60           | 59.68 | 01/2007 - 05/2020 |
| 141          | PalmadeMallorcaTG  | 2.64         | 39.56           | 09/2009 - 05/2020        | 200      | RorvikTG              | 11.23           | 64.86 | 01/2007 - 05/2020 |
| 142          | Plymouth           | -4.19        | 50.37           | 01/1993 - 05/2020        | 201      | StavangerTG           | 5.73            | 58.97 | 01/2014 - 05/2020 |
| 143          | PortEllen          | -6.19        | 55.63           | 01/1993 - 02/2011        | 202      | ThyboronKystTG        | 8.21            | 56.71 | 01/2015 - 05/2020 |
| 144          | Portpatrick        | -5.12        | 54.84           | 01/1993 - 05/2020        | 203      | TorsmindeKystTG       | 8.12            | 56.37 | 01/2015 - 05/2020 |
| 145          | Portrush           | -6.67        | 55.20           | 07/1995 - 05/2020        | 204      | TregdeTG              | 7.55            | 58.01 | 01/2007 - 05/2020 |
| 146          | Portsmouth         | -1.11        | 50.80           | 01/1993 - 05/2020        | 205      | TromsøeTG             | 18.96           | 69.65 | 01/2007 - 05/2020 |
| 147          | RingaskiddyNMCI    | -8.30        | 51.84           | 01/2012 - 05/2020        | 206      | VardoeTG              | 31.10           | 70.37 | 01/2014 - 05/2020 |
| 148          | RossaveelPier      | -9.56        | 53.27           | 09/2020 - 05/2020        | 207      | VikerTG               | 10.95           | 59.04 | 01/2007 - 05/2020 |
| 149          | SaguntoTG          | -0.21        | 39.63           | 07/2006 - 05/2020        | 208      | VlakteVdRaamTG        | 3.24            | 51.50 | 08/2014 - 05/2020 |
| 150          | <b>SantanderTG</b> | <b>-3.79</b> | <b>43.46</b>    | <b>01/1993 - 05/2020</b> | 209      | VlielandHavenTG       | 5.09            | 53.30 | 08/2014 - 05/2020 |
| 151          | StHelier           | -2.12        | 49.18           | 01/1993 - 05/2020        | 210      | WangeroogeTG          | 7.93            | 53.81 | 01/2014 - 05/2020 |
| 152          | Stornoway          | -6.38        | 58.22           | 01/1993 - 05/2020        | 211      | WestkapelleTG         | 3.44            | 51.52 | 08/2014 - 05/2020 |
| 153          | TarifaTG           | -5.60        | 36.01           | 07/2009 - 05/2020        | 212      | WilhelmshavenTG       | 8.15            | 53.51 | 01/2014 - 05/2020 |
| 154          | TarragonaTG        | 1.21         | 41.08           | 05/2011 - 05/2020        | 213      | ZeebruggeTG           | 3.20            | 51.35 | 08/2014 - 05/2020 |
| 155          | Tobermory          | -6.06        | 56.62           | 03/1993 - 05/2020        |          |                       |                 |       |                   |
| 156          | <b>ValenciaTG</b>  | <b>-0.33</b> | <b>39.46</b>    | <b>01/1993 - 05/2020</b> |          |                       |                 |       |                   |
| 157          | VigoTG             | -8.73        | 42.24           | 01/1993 - 05/2020        |          |                       |                 |       |                   |
| 158          | Weymouth           | -2.45        | 50.61           | 01/1993 - 05/2020        |          |                       |                 |       |                   |
| 159          | Wick               | -3.08        | 58.43           | 01/1993 - 05/2020        |          |                       |                 |       |                   |
| 160          | ANDRATX            | 2.39         | 39.55           | 06/2011 - 05/2020        |          |                       |                 |       |                   |
| 161          | AalesundTG         | 6.15         | 62.47           | 01/2007 - 05/2020        |          |                       |                 |       |                   |



385 **Table A2. Tide gauge stations from the subset covering the 20 year period spanning from January 2000 to December 2019 located in the Baltic and Mediterranean Seas, and along the North Atlantic European shore. The location of the tide gauge sites, the linear trend (mm year<sup>-1</sup>) computed from the DUACS DT2021 and DT2018 reprocessing *all satellites* and *two satellites* altimeter closest grid point to tide gauges, the tide gauges, and the mean trend value are displayed.**

| Station            | Longitude (°E) | Latitude (°N) | Trend DT2021 all satellites (mm year <sup>-1</sup> ) | Trend DT2021 two satellites (mm year <sup>-1</sup> ) | Trend DT2018 all satellites (mm year <sup>-1</sup> ) | Trend DT2018 two satellites (mm year <sup>-1</sup> ) | Trend TG (mm year <sup>-1</sup> ) |
|--------------------|----------------|---------------|------------------------------------------------------|------------------------------------------------------|------------------------------------------------------|------------------------------------------------------|-----------------------------------|
| Barseback          | 12.90          | 55.76         | 3.22                                                 | 3.26                                                 | 2.99                                                 | 2.88                                                 | 2.60                              |
| Forsmark           | 18.21          | 60.41         | 3.49                                                 | 3.53                                                 | 3.71                                                 | 3.03                                                 | 1.12                              |
| Furuogrund         | 21.23          | 64.92         | 3.33                                                 | 3.07                                                 | 3.45                                                 | 2.82                                                 | 2.62                              |
| GoteborgTorshammen | 11.79          | 57.68         | 3.62                                                 | 3.70                                                 | 3.84                                                 | 3.56                                                 | 2.31                              |
| Hanko              | 22.98          | 59.82         | 2.33                                                 | 2.81                                                 | 2.88                                                 | 2.72                                                 | 0.16                              |
| Kungsholmsfort     | 15.59          | 56.11         | 3.12                                                 | 2.87                                                 | 3.19                                                 | 2.37                                                 | 2.96                              |
| Kungsvik           | 11.13          | 59.00         | 3.52                                                 | 3.50                                                 | 3.70                                                 | 3.60                                                 | 1.72                              |
| OlandsNorraUdde    | 17.10          | 57.37         | 3.10                                                 | 3.03                                                 | 3.18                                                 | 2.58                                                 | 0.69                              |
| Oskarshamn         | 16.48          | 57.28         | 3.02                                                 | 3.05                                                 | 3.24                                                 | 2.50                                                 | 1.27                              |
| Pori               | 21.46          | 61.59         | 4.11                                                 | 3.64                                                 | 4.35                                                 | 3.50                                                 | 4.34                              |
| Ratan              | 20.90          | 63.99         | 3.34                                                 | 3.19                                                 | 3.48                                                 | 2.77                                                 | 2.02                              |
| Simrishamn         | 14.36          | 55.56         | 3.12                                                 | 2.90                                                 | 3.21                                                 | 2.65                                                 | 1.34                              |
| Skonor             | 12.83          | 55.42         | 3.43                                                 | 3.26                                                 | 3.33                                                 | 2.83                                                 | 2.14                              |
| Smogen             | 11.22          | 58.35         | 3.23                                                 | 3.50                                                 | 3.48                                                 | 3.50                                                 | 1.26                              |
| Spikarna           | 17.53          | 62.36         | 3.56                                                 | 3.32                                                 | 3.75                                                 | 3.05                                                 | 0.99                              |
| Stenungsund        | 11.83          | 58.09         | 3.63                                                 | 3.75                                                 | 3.48                                                 | 3.49                                                 | 1.93                              |
| Stockholm          | 18.08          | 59.32         | 3.02                                                 | 3.23                                                 | 3.37                                                 | 3.01                                                 | 1.26                              |
| Viken              | 12.58          | 56.14         | 3.21                                                 | 3.42                                                 | 3.22                                                 | 3.10                                                 | 1.51                              |
| Visby              | 18.28          | 57.64         | 3.13                                                 | 2.80                                                 | 3.35                                                 | 2.70                                                 | 0.73                              |
| Brest              | -4.50          | 48.38         | 2.57                                                 | 2.61                                                 | 2.68                                                 | 2.57                                                 | 2.64                              |
| SaintMalo          | -2.03          | 48.64         | 1.26                                                 | 2.59                                                 | 1.60                                                 | 2.54                                                 | 2.37                              |
| Bilbao             | -3.05          | 43.36         | 2.63                                                 | 2.36                                                 | 2.40                                                 | 2.10                                                 | 2.94                              |
| Huelva             | -6.83          | 37.13         | 3.30                                                 | 3.39                                                 | 3.05                                                 | 2.85                                                 | 2.27                              |
| Santander          | -3.79          | 43.46         | 2.33                                                 | 2.42                                                 | 2.51                                                 | 2.12                                                 | 1.88                              |
| Barcelona          | 2.16           | 41.34         | 3.33                                                 | 3.25                                                 | 3.07                                                 | 2.77                                                 | 5.06                              |
| Malaga             | -4.42          | 36.71         | 3.25                                                 | 2.58                                                 | 2.19                                                 | 2.58                                                 | 0.77                              |
| Valencia           | -0.33          | 39.46         | 3.62                                                 | 3.47                                                 | 3.15                                                 | 2.84                                                 | 2.13                              |
| <b>Mean value</b>  |                |               | <b>3.14</b>                                          | <b>3.13</b>                                          | <b>3.18</b>                                          | <b>2.85</b>                                          | <b>1.96</b>                       |



## 390 **Data availability**

Altimetry datasets are available from the Copernicus Marine Service web portal (<https://resources.marine.copernicus.eu/products/>, last access: 15 July 2022). Tide gauge measurements are available from the Copernicus Marine INS-TAC data repository web portal ([www.marineinsitu.eu](http://www.marineinsitu.eu), last access: 3 June 2022). Tide gauge data are provided by the following regional in situ data production centres: Puertos del Estado (Spain) for the Iberia-Biscay-Ireland region; HCMR (Greece) for the Mediterranean Sea; IMR (Norway) for the Arctic; SMHI (Sweden) for the Baltic Sea; BSH (Germany) for the North West Shelves region; Coriolis (France) for the global ocean. The ancillary data used to obtain the Dynamic Atmospheric Correction applied to the altimetry grid point closest to the tide gauge locations are available at the AVISO webpage: <https://www.aviso.altimetry.fr/en/> (last access: 16 May 2022).

## **Author contributions**

400 Conceptualisation: Antonio Sánchez Román, M. Isabelle Pujol, Ananda Pascual and Yannice Faugère; altimetry data processing: M. Isabelle Pujol; tide gauge data processing: Antonio Sánchez Román; statistical analysis: Antonio Sánchez Román and Ananda Pascual; manuscript writing: Antonio Sánchez Román, with inputs from all co-authors. All authors have read and agreed to the published version of the manuscript.

## **Competing interests**

405 The authors declare that they have no conflict of interest

## **Acknowledgement**

This study has been conducted in the frame of the Copernicus Marine Service SL-TAC and In Situ TAC (INS-TAC) projects. The Copernicus Marine Service, led by Mercator-Ocean, is based on a distributed model of service production, relying on the expertise of a wide network of participating European organisations involved in operational oceanography. We acknowledge the regional in situ data production centres responsible for the collection and distribution of the tide gauge data used in this study: Puertos del Estado (Spain) for the Iberia-Biscay-Ireland region; HCMR (Greece) for the Mediterranean Sea; IMR (Norway) for the Arctic; SMHI (Sweden) for the Baltic Sea; BSH (Germany) for the North-West Shelves region; Coriolis (France) for the global ocean. This work represents a contribution to CSIC Interdisciplinary Thematic Platform (PTI) Teledetección. (PTI-TELEDETECT)





## 415 References

- Ballarotta, M., Ubelmann, C., Pujol, M.-I., Taburet, G., Fournier, F., Legeais, J.-F., Faugère, Y., Delepoulle, A., Chelton, D., Dibarboure, G., and Picot, N.: On the resolutions of ocean altimetry maps, *Ocean Sci.*, 15, 1091–1109, <https://doi.org/10.5194/os-15-1091-2019>, 2019.
- Carrère, L., and F. Lyard: Modeling the barotropic response of the global ocean to atmospheric wind and pressure forcing—  
420 comparisons with observations. *Geophys. Res. Lett.* 30: 1275. doi: 10.1029/2002GL016473, 2003
- Cipollini, P., Calafat, F.-M., Jevrejeva, S., Melet, A., Prandi, P.: Monitoring sea level in the coastal zone with satellite altimetry and tide gauges. *Surv. Geophys.* 2017, 38:33–57. <https://doi.org/10.1007/s10712-016-9392-0>, 2017
- Codiga, D.L.: Unified Tidal Analysis and Prediction Using the UTide Matlab Functions. Technical Report 2011-01. Graduate School of Oceanography, University of Rhode Island, Narragansett, RI. 59pp.  
425 <ftp://www.po.gso.uri.edu/pub/downloads/codiga/pubs/2011Codiga-UTide-Report.pdf>, 2011
- Dibarboure, G., Pujol, M.-I., Briol, F., Le Traon, P.-Y., Larnicol, G., Picot, N., Mertz, F., Escudier, P., Ablain, M., and Dufau, C.: Jason-2 in DUACS: first tandem results and impact on processing and products, *Mar. Geod.*, OSTM Jason-2 Calibration/Validation Special Edition – Part 2, 34, 214–241, doi:10.1080/01490419.2011.584826, 2011.
- Dorandeu, J., and P.-Y. Le Traon: Effects of global mean atmospheric pressure variations on mean sea level changes from  
430 Topex/Poseidon. *J. Atmos. Oceanic Technol.* 16: 1279 – 1283, 1999.
- Efron, B., and Tibshirani, R.: Bootstrap methods for standart errors, condifence intervals, and other measures of statistical accuracy, *Statistical Science*, Vol. 1, No. 1: 54 – 77, 1986.
- Faugère, Y., Taburet, G., Ballarotta, M., Pujol, I., Legeais, J. F., Maillard, G., Durand, C., Dagneau, Q., Lievin, M., Sanchez Roman, A., and Dibarboure, G.: DUACS DT2021: 28 years of reprocessed sea level altimetry products, EGU General  
435 Assembly 2022, Vienna, Austria, 23–27 May 2022, EGU22-7479, <https://doi.org/10.5194/egusphere-egu22-7479>, 2022.
- Jousset, S. and Mulet: New Mean Dynamic Topography of the Black Sea and Mediterranean Sea from altimetry, gravity and in-situ data, 2020.
- Jousset, S., Aydogdu, A., Ciliberti, S., Clementi, E., Escudier, R., Jansen, E., Lima, L., Menna, M., Mulet, S., Nigam, T., Sanchez-Roman, A., Tarry, D. R., Pascual, A., Peneva, E., Poulain, P.-M., and Taupier- Letage, I.: New Mean Dynamic  
440 Topography of the Mediterranean Sea from altimetry, gravity and in- situ data, 2022 (in preparation).
- Marcos, M., Pascual, A., and Pujol, I.: Improved satellite altimeter mapped sea level anomalies in the Mediterranean Sea: A comparison with tide gauges, *Advances in Space Research* 56, 596 – 604, <https://doi.org/10.1016/j.asr.2015.04.027>, 2015.
- Mulet, S., Rio, M.-H., Etienne, H., Artana, C., Cancet, M., Dibarboure, G., Feng, H., Husson, R., Picot, N., Provost, C., and Strub, P. T.: The new CNES-CLS18 global mean dynamic topography, 17, 789–808, <https://doi.org/10.5194/os-17-789-2021>,  
445 2021.
- Pascual, A.; Faugère, Y.; Larnicol, G.; Le Traon, P.-Y.: Improved description of the ocean mesoscale variability by combining four satellite altimeters. *Geophys. Res. Lett.*, 33, L02611, 2006.



- Pascual, A., Boone, C., Larnicol, G., Le Traon, P.Y.: On the quality of real-time altimeter gridded fields: comparison with in situ data. *J. Atmos. Ocean. Technol.* 2009, 26, 556–569. <https://doi.org/10.1175/2008JTECHO556.1>, 2009.
- 450 Peltier W.R.: Postglacial Variations in the Level of the Sea: Implications for Climate Dynamics and Solid-Earth Geophysics. *Reviews of Geophysics* 1998. 36(4),603-689, 1998. <sup>[L]</sup><sub>[SEP]</sub>
- Peltier W.R.: Global Glacial Isostasy and the Surface of the Ice-Age Earth: The ICE-5G(VM2) model and GRACE. *Ann. Rev. Earth. Planet. Sci.* 2004. 32,111-149, 2004.
- PSMSL. Permanent Service for Mean Sea Level: “Tide Gauge Data”. 2016. Available online: <http://www.psmsl.org/data/obtaining/> (accessed on 4 July 2022).
- 455 PUGS document of the sea level products version vDT2021 D3.SL.1-v2.0\_PUGS\_of\_v2DT2021\_SeaLevel\_products\_v1.1, 2021. Available online: [https://datastore.copernicus-climate.eu/documents/satellite-sea-level/vDT2021/D3.SL.1-v2.0\\_PUGS\\_of\\_v2DT2021\\_SeaLevel\\_products\\_v1.1\\_APPROVED\\_Ver1.pdf](https://datastore.copernicus-climate.eu/documents/satellite-sea-level/vDT2021/D3.SL.1-v2.0_PUGS_of_v2DT2021_SeaLevel_products_v1.1_APPROVED_Ver1.pdf) (accessed on 4 July 2022).
- QUID document for Sea Level TAC DUACS products CMEMS-SL-QUID-008-032-068, 2022. Available online: <https://catalogue.marine.copernicus.eu/documents/QUID/CMEMS-SL-QUID-008-032-068.pdf> (accessed on 4 July 2022).
- 460 Sánchez-Román, A., Ruiz, S., Pascual, A., Mourre, B., and Guinehut, S.: On the mesoscale monitoring capability of Argo floats in the Mediterranean Sea, *Ocean Sci.*, 13, 223–234, <https://doi.org/10.5194/os-13-223-2017>, 2017.
- Sánchez-Román, A.; Pascual, A.; Pujol, M.-I.; Taburet, G.; Marcos, M.; Faugère, Y.: Assessment of DUACS Sentinel-3A Altimetry Data in the Coastal Band of the European Seas: Comparison with Tide Gauge Measurements. *Remote Sens.* 2020, 12, 3970, <https://doi.org/10.3390/rs12233970>, 2020.
- 465 Taibi, H., Haddad, M.: Estimating trends of the Mediterranean Sea level changes from tide gauge and satellite altimetry data (1993–2015). *J. Ocean. Limnol.* 37, 1176–1185. <https://doi.org/10.1007/s00343-019-8164-3>, 2019.
- Valladeau ,G., Legeais, J. F., Ablain, M., Guinehut, S., and Picot, N.: Comparing Altimetry with Tide Gauges and Argo Profiling Floats for Data Quality Assessment and Mean Sea Level Studies, *Marine Geodesy*, 35:sup1, 42-60, DOI: 10.1080/01490419.2012.718226, 2012.
- 470 Vignudelli, S., Birol, F., Benveniste, J., Fu, L.-L., Picot, N., Raynal, M., and Roinard, H.: Satellite Altimetry Measurements of Sea Level in the Coastal Zone. *Surv. Geophys.* 40. 1319–1349. <https://doi.org/10.1007/s10712-019-09569-1>, 2019.
- Von Schuckmann, K., Le Traon, P.-Y., Smith, N., Pascual, A., Brasseur, P.; Fennel, K., Djavidnia, S., Aaboe, S., Fanjul, E.A., Autret, E., et al.: Copernicus Marine Service Ocean State Report. *J. Oper. Ocean.*, 11, S1–S142, 2018.
- 475 Wöppelmann, G.; Marcos, M.: Vertical land motion as a key to understanding sea level change and variability. *Rev. Geophys.*, 54, 64–92, <https://doi.org/10.1002/2015RG000502>, 2016.
